# Supplementary material
Source: Elsevier journal article supplement (https://www.sciencedirect.com/science/article/pii/S0301054619300898)
Supplement: mmc2 [file S0301054619300898:mmc2.docx]

**VARIABLES RECORDED AT 6 YEARS OF AGE**

**Dependent variables:**

- Primary follow-up variable: presentation of at least one wheezing episode in the last 12 months.

- Wheezing episodes recorded between 3 and 6 years of age.

**Independent variables:**

- Atopic information of the child: atopic dermatitis, allergological skin test result.
- Environmental factor exposure data: smoking, presence of furry pets at home.
- Data referring to medical care required due to wheezing episodes: visits to the emergency department; oral corticosteroid use; hospitalization (ward or Pediatric Intensive Care Unit); and rescue and maintenance treatment.
